# Supplementary material for: A functional assay for serum detection of antibodies against SARS‐CoV‐2 nucleoprotein
Source: PubMed Central journal article supplement (PMC8408615; doi:10.15252/embj.2021108588), 2021-07-29

Figure 1 source data

uncropped blots for panel I

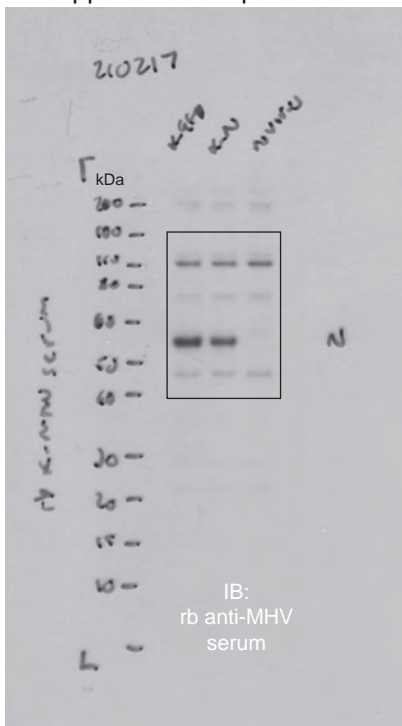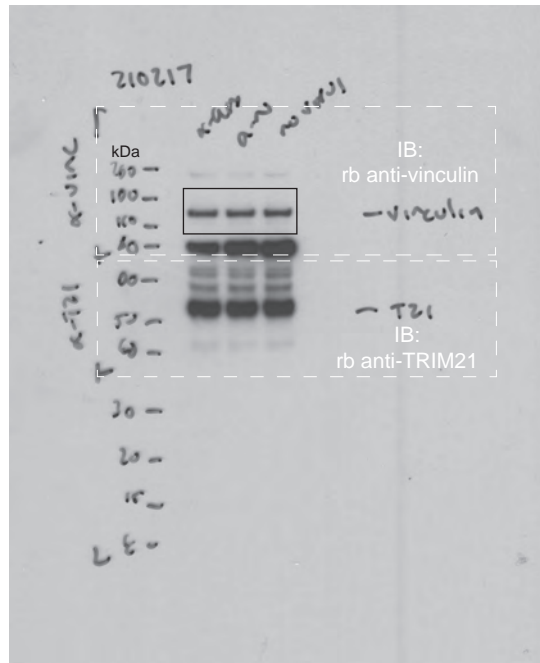

Supplement: EMBJ-40-e108588-s004.pdf [file EMBJ-40-e108588-s004.pdf]
